# Supplementary material for: Emotional Engagement and Trading Performance
Source: Atypon-hosted journal article supplement (doi:10.1287/mnsc.2023.4883), 2023-10-11
Supplement: mnsc.2023.4883.sm1.pdf [file mnsc.2023.4883.sm1.pdf]

# Electronic Companion

## EC.1. Experimental Instructions

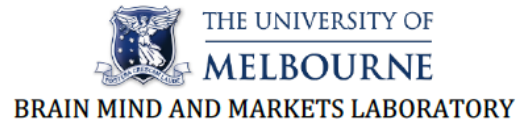

### INSTRUCTIONS

#### Summary

Your task will be to complete a trading game on our online trading platform. There will be a practice session, to provide ample opportunity to familiarise yourself with the online marketplace.

In the main trading session, which counts towards your earnings, you have the opportunity to trade a single, 15-period-lived security called "stock." The stock pays a random dividend at the end of each period. The expected dividend each period is 0.50 (experimental) dollar. You start with an endowment of cash and stock. You can sell stocks for cash, and/or use cash to buy stocks.

Your goal is to maximise your performance, measured by dividends received from holding stocks, plus cash accumulation through trading. You will be given an extra 10 (real) dollars as sign-up reward.

#### Online platforms

The trading games take place in an online trading platform called Flex-E-Markets. This online marketplace can be accessed through the following link: <http://flexemarkets.com>. Log on to the account and with the email and password given to you.

### A. Practice Session

#### A1. Setting

During the practice session, participants will be given the opportunity to trade a single asset called 'Apple', in the marketplace is named '*Monash Apple Market*'. At the end of the session, all available apples will be bought back by us at a random price. The price will be one of 0, 4, 6 and 10 (experimental) dollars, with equal chance. This means that the expected payoff for each apple is  $(0 + 4 + 6 + 10)/4 = 5$  dollars.

#### A2. Trading

The trading platform is organised as a continuous open book system, in which you can submit orders to buy (bids) and orders to sell (asks) at any time when the market is open. When your bid is at a price higher than the best standing ask, you will trade immediately with the originator of that ask, at the ask price. When you submit an ask at a price below that of the best standing bid, you trade immediately with the bid originator, at the bid price. If there are more than one order at the same price, earlier orders get executed first. Order submission and transactions are anonymous.

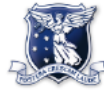

THE UNIVERSITY OF  
MELBOURNE

## BRAIN MIND AND MARKETS LABORATORY

The order submission area is located at the left-hand-side of the trading screen. There, you can switch between buying and selling using the “Buy/Sell” button, specify the quantity under “Units” and set your price using the slider below “Price”. At any moment while the market is open, you can see outstanding bids and asks as blue (bids) and red (asks) entries. By toggling the “All/Mine” button, you can switch between viewing all the orders in market or the orders originated by you. You will be able to cancel your own orders if you need to do so. You will also be able to observe the list of prior transactions including information on time, price and (cumulative) quantity.

### **B. Main Trading Session**

In the main trading session, you will be trading a single security called ‘Stock’ against cash, in the marketplace named ‘*Monash Stock Market*’, while sensors attached to your fingers and wrist track your heartbeat and transpiration. There will be fifteen (15) trading periods. After each of them, the stock pays a random dividend. After paying the last dividend in period 15, the stock expires worthless. Periods will last 5 minutes or less.

At the beginning of the first period, about half of the participants start with 20 units of stock and 100 experimental dollars. The remaining participants will start with 12 units of stock and 160 experimental dollars.

During each period, the market will be open and you will be able to trade. When the market closes we use random number generator to determine the dividend. We generate a uniformly distributed random integer from 1 to 100. If the generated number is in the range of [1 25], the dividend will be \$0. If the generated random number falls in [26 50], the dividend will be \$0.25. If the generated number falls in [51 75], the dividend will be \$0.50, and if the generated number falls in [76 100], the dividend will be \$1.25. As such, the expected period dividend equals \$0.50 ( $=1/4*(0+0.25+0.5+1.25)$ ).

The dividend will be distributed to you in the form of experimental cash and paid for each unit of stock you own at the end of the period. For example, if in period 1 you end with 25 units of stock and the dividend is \$0.25, then \$6.25 ( $=25*0.25$ ) will be added to your experimental cash. In period 2 you will thus start with the same 25 units of the stock, but your cash will have increased relative to the end of period 1 by \$6.25.

Each period, the dividend on each stock is \$0.50 on average. Since there are 15 periods, the sum of all expected dividends in period 1 is \$7.50 ( $=15*0.50$ ) for each stock. In the second period the stock will have paid its first dividend, so there are only 14 more payments left, each worth \$0.50 in

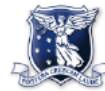

THE UNIVERSITY OF  
MELBOURNE

BRAIN MIND AND MARKETS LABORATORY

expectation. So, the sum of all remaining expected dividends is \$7 ( $=14*0.50$ ). In the third period there will be 13 more payments left, with an expected total dividend of \$6.50, etc.

How much you are willing to buy or sell your stock for in any given period will depend on the horizon you plan to hold this stock for and what you foresee other participants to be willing to buy and sell the stock for.

### ***C. Compensation***

The cash you are holding at the end of the 15<sup>th</sup> period is yours to take home. It will be converted to real dollars at a 10:1 exchange rate (meaning that 10 experimental dollars convert into 1 real dollar). In addition, you will be given 10 (real) dollars as sign-up reward. The expected amount of compensation for each participant in this experiment is \$35. The actual amount can be higher or lower depending on your individual performance but will not be above \$55 or below \$25.

## EC.2. Experimental Setup: Trading Software and Physiological Measurement Devices

A. Screenshot of trading software

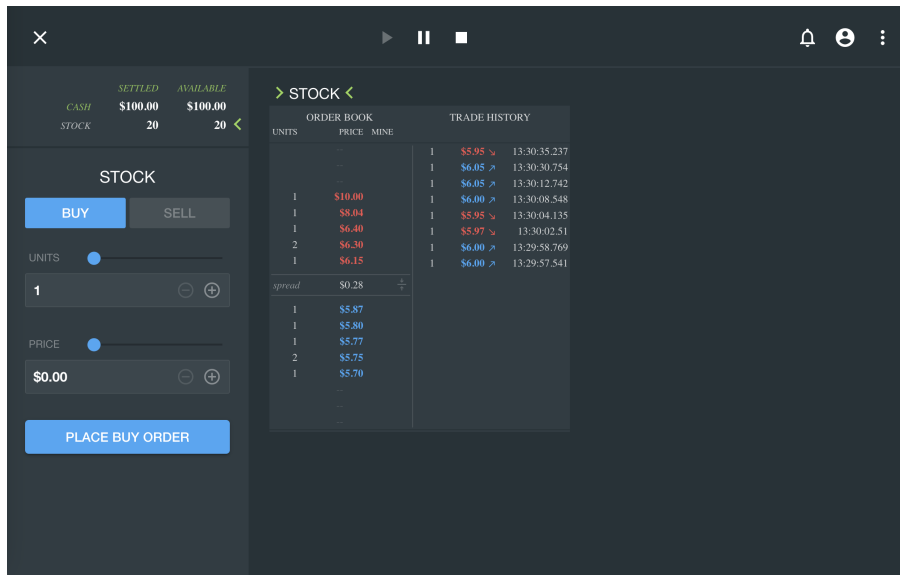

B. Measurement devices

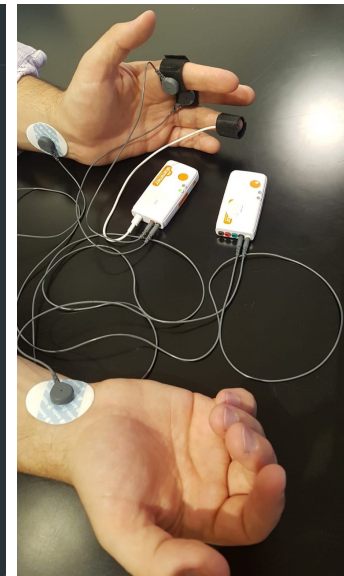

**Figure EC.1** A. Limit order book of continuous double auction implemented with Flex-E-Markets. B. ECG sensors on wrists, SCR sensors on fingers of non-dominant hand.

### **EC.3. Data and Code**

The data and code for all results reported in the paper can be found in the Github repository [bmmlab/EmotionsInSSW](#). Here, we provide the output of the general linear modeling used to produce Figure 6 and Figure 7. Meaning of the variables can be found in the README file and Matlab code in the Github repository.

#### **EC.3.1. Regression of Earnings onto Logarithm of Granger Causality Test Statistics, Interaction with ECP Calibration ONLY**

Test 1 results are listed under the heading “Theoretical Likelihood Ratio Test.” Individual slope coefficients (dots in Figure 6) are listed under “Fixed Effects.”

## 1. HR Granger-Causes Ind Mispricing

```

mdl =
Generalized linear mixed-effects model fit by PL

Model information:
Number of observations      123
Fixed effects coefficients    5
Random effects coefficients 16
Covariance parameters       2
Distribution                 Normal
Link                         Identity
FitMethod                    MPL

Formula:
Earnings ~ 1 + Granger_0:Treatment + Granger_5:Treatment + Granger_10:Treatment + Granger_15:Treatment + (1 | Session)

Model fit statistics:
AIC      BIC      Loglikelihood      Deviance
2512.4   2532.1   -1249.2      2498.4

Fixed effects coefficients (95% CIs):
Name      Estimate      SE      tStat      DF      pValue      Lower      Upper
{'(Intercept)'}      24751      753.38      32.854      118      3.2581e-61      23259      26243
{'Granger_0:Treatment_1'}      886.9      299.2      2.9643      118      0.0036714      294.41      1479.4
{'Granger_5:Treatment_1'}      229.32      327.95      0.69928      118      0.48576      -420.1      878.74
{'Granger_10:Treatment_1'}      621.07      368.78      1.6841      118      0.094799      -109.21      1351.4
{'Granger_15:Treatment_1'}      -1244.1      411.97      -3.0198      118      0.0031013      -2059.9      -428.24

Random effects covariance parameters:
Group: Session (16 Levels)
Name1      Name2      Type      Estimate
{'(Intercept)'}      {'(Intercept)'}      {'std'}      1329.7

Group: Error
Name      Estimate
{'sqrt(Dispersion)'}      6106

LRstat =
Theoretical Likelihood Ratio Test
Model      DF      AIC      BIC      LogLik      LRstat      deltaDF      pValue
mdlR      3      2519.6      2528      -1256.8
mdl      7      2512.4      2532.1      -1249.2      15.144      4      0.0044115

```

## 2. Ind Mispricing Granger-Causes HR

```
mdl =
Generalized linear mixed-effects model fit by PL

Model information:
Number of observations      123
Fixed effects coefficients    8
Random effects coefficients  16
Covariance parameters       2
Distribution                 Normal
Link                         Identity
FitMethod                    MPL

Formula:
Earnings ~ 1 + Granger_0:Treatment + Granger_5:Treatment + Granger_10:Treatment + Granger_15:Treatment + Granger_20:Treatment +
Granger_25:Treatment + Granger_30:Treatment + (1 | Session)

Model fit statistics:
AIC      BIC      LogLikelihood      Deviance
2526.1   2554.2   -1253                    2506.1

Fixed effects coefficients (95% CIs):
Name      Estimate      SE      tStat      DF      pValue      Lower      Upper
{'(Intercept)'}      24151      639.97      37.738      115      1.2855e-66      22883      25419
{'Granger_0:Treatment_1'}      -499.86      409.78      -1.2198      115      0.22503      -1311.6      311.83
{'Granger_5:Treatment_1'}      25.454      332.77      0.076492      115      0.93916      -633.69      684.6
{'Granger_10:Treatment_1'}      247.76      351.11      0.70565      115      0.48183      -447.72      943.24
{'Granger_15:Treatment_1'}      850.5      490.61      1.7335      115      0.085679      -121.31      1822.3
{'Granger_20:Treatment_1'}      -142.78      439.11      -0.32515      115      0.74565      -1012.6      727.02
{'Granger_25:Treatment_1'}      -379.38      419.17      -0.90507      115      0.36732      -1209.7      450.92
{'Granger_30:Treatment_1'}      -677.59      348.62      -1.9436      115      0.054384      -1368.1      12.964

Random effects covariance parameters:
Group: Session (16 Levels)
Name1      Name2      Type      Estimate
{'(Intercept)'}      {'(Intercept)'}      {'std'}      679.7

Group: Error
Name      Estimate
{'sqrt(Dispersion)'}      6393.1

LRstat =

Theoretical Likelihood Ratio Test
Model      DF      AIC      BIC      LogLik      LRStat      deltaDF      pValue
mdlR      3      2519.6      2528      -1256.8
mdl      10      2526.1      2554.2      -1253      7.4777      7      0.38089
```

### 3. HR Granger-Causes Holdings

```

mdl =
Generalized linear mixed-effects model fit by PL

Model information:
Number of observations      123
Fixed effects coefficients    5
Random effects coefficients  16
Covariance parameters       2
Distribution                 Normal
Link                         Identity
FitMethod                    MPL

Formula:
Earnings ~ 1 + Granger_0:Treatment + Granger_5:Treatment + Granger_10:Treatment + Granger_15:Treatment + (1 | Session)

Model fit statistics:
AIC      BIC      LogLikelihood      Deviance
2522.2   2541.9   -1254.1      2508.2

Fixed effects coefficients (95% CIs):
Name      Estimate      SE      tStat      DF      pValue      Lower      Upper
{'(Intercept)'}      24411      752.91      32.422      118      1.329e-60      22920      25902
{'Granger_0:Treatment_1'}      26.283      362.87      0.07243      118      0.94238      -692.31      744.87
{'Granger_5:Treatment_1'}      577.8      351.21      1.6451      118      0.1026      -117.7      1273.3
{'Granger_10:Treatment_1'}      -414.88      322.7      -1.2856      118      0.20109      -1053.9      224.16
{'Granger_15:Treatment_1'}      433.23      312.67      1.3856      118      0.16849      -185.95      1052.4

Random effects covariance parameters:
Group: Session (16 Levels)
Name1      Name2      Type      Estimate
{'(Intercept)'}      {'(Intercept)'}      {'std'}      1381.3

Group: Error
Name      Estimate
{'sqrt(Dispersion)'}      6353.6

Theoretical Likelihood Ratio Test
Model      DF      AIC      BIC      LogLik      LRStat      deltaDF      pValue
mdlLR      3      2519.6      2528      -1256.8
mdl        7      2522.2      2541.9      -1254.1      5.3794      4      0.25054

```

#### 4. Holdings Granger-Cause HR

```

mdl =
Generalized linear mixed-effects model fit by PL

Model information:
Number of observations      123
Fixed effects coefficients    8
Random effects coefficients  16
Covariance parameters       2
Distribution                 Normal
Link                          Identity
FitMethod                     MPL

Formula:
Earnings ~ 1 + Granger_0:Treatment + Granger_5:Treatment + Granger_10:Treatment + Granger_15:Treatment + Granger_20:Treatment +
Granger_25:Treatment + Granger_30:Treatment + (1 | Session)

Model fit statistics:
AIC      BIC      Loglikelihood      Deviance
2512.4   2540.5   -1246.2      2492.4

Fixed effects coefficients (95% CIs):
Name      Estimate      SE      tStat      DF      pValue      Lower      Upper
{'(Intercept)'}      24565      666.29      36.869      115      1.5272e-65      23246      25885
{'Granger_0:Treatment_1'}      -421.02      358.24      -1.1753      115      0.24232      -1130.6      288.58
{'Granger_5:Treatment_1'}      884.5      407.47      2.1707      115      0.032006      77.392      1691.6
{'Granger_10:Treatment_1'}      -1948.4      522.82      -3.7267      115      0.00030242      -2984      -912.79
{'Granger_15:Treatment_1'}      644.17      391.12      1.647      115      0.10229      -130.57      1418.9
{'Granger_20:Treatment_1'}      -379.74      411.78      -0.92218      115      0.35837      -1195.4      435.93
{'Granger_25:Treatment_1'}      150.79      335.95      0.44883      115      0.6544      -514.67      816.24
{'Granger_30:Treatment_1'}      36.288      353.68      0.1026      115      0.91846      -664.29      736.86

Random effects covariance parameters:
Group: Session (16 Levels)
Name1      Name2      Type      Estimate
{'(Intercept)'}      {'(Intercept)'}      {'std'}      1272.3

Group: Error
Name      Estimate
{'sqrt(Dispersion)'}      5963.3

LRstat =

Theoretical Likelihood Ratio Test
Model      DF      AIC      BIC      LogLik      LRStat      deltaDF      pValue
mdlR      3      2519.6      2528      -1256.8
mdl      10      2512.4      2540.5      -1246.2      21.134      7      0.0035765

```

## 5. HR Granger-Causes B/A Spread

```

mdl =
Generalized linear mixed-effects model fit by PL

Model information:
Number of observations      123
Fixed effects coefficients    5
Random effects coefficients  16
Covariance parameters       2
Distribution                 Normal
Link                         Identity
FitMethod                    MPL

Formula:
Earnings ~ 1 + Granger_0:Treatment + Granger_5:Treatment + Granger_10:Treatment + Granger_15:Treatment + (1 | Session)

Model fit statistics:
AIC      BIC      LogLikelihood      Deviance
2521    2540.7    -1253.5      2507

Fixed effects coefficients (95% CIs):
Name      Estimate      SE      tStat      DF      pValue      Lower      Upper
{'(Intercept)'}      24535      633.13      38.751      118      5.8343e-69      23281      25789
{'Granger_0:Treatment_1'}      578.56      361.56      1.6002      118      0.11223      -137.43      1294.5
{'Granger_5:Treatment_1'}      -37.248      415.26      -0.089697      118      0.92868      -859.58      785.08
{'Granger_10:Treatment_1'}      732.75      412.42      1.7767      118      0.078193      -83.954      1549.5
{'Granger_15:Treatment_1'}      -430.38      358.2      -1.2015      118      0.23196      -1139.7      278.96

Random effects covariance parameters:
Group: Session (16 Levels)
Name1      Name2      Type      Estimate
{'(Intercept)'}      {'(Intercept)'}      {'std'}      522.49

Group: Error
Name      Estimate
{'sqrt(Dispersion)'}      6431.2

LRstat =
Theoretical Likelihood Ratio Test
Model      DF      AIC      BIC      LogLik      LRstat      deltaDF      pValue
mdlIR      3      2519.6      2528      -1256.8
mdl         7      2521      2540.7      -1253.5      6.5582      4      0.16116

```

## 6. B/A Spread Granger-Causes HR

```

mdl =
Generalized linear mixed-effects model fit by PL

Model information:
Number of observations      123
Fixed effects coefficients    8
Random effects coefficients  16
Covariance parameters       2
Distribution                 Normal
Link                         Identity
FitMethod                    MPL

Formula:
Earnings ~ 1 + Granger_0:Treatment + Granger_5:Treatment + Granger_10:Treatment + Granger_15:Treatment + Granger_20:Treatment +
Granger_25:Treatment + Granger_30:Treatment + (1 | Session)

Model fit statistics:
AIC      BIC      Loglikelihood      Deviance
2527.5   2555.6   -1253.7      2507.5

Fixed effects coefficients (95% CIs):
Name      Estimate      SE      tStat      DF      pValue      Lower      Upper
{'(Intercept)'}      24558      736.68      33.336      115      6.1272e-61      23099      26017
{'Granger_0:Treatment_1'}      -383.21      429.62      -0.89197      115      0.37427      -1234.2      467.79
{'Granger_5:Treatment_1'}      -200.83      349.42      -0.57474      115      0.56659      -892.96      491.31
{'Granger_10:Treatment_1'}      -24.739      442.46      -0.055912      115      0.95551      -901.16      851.68
{'Granger_15:Treatment_1'}      -101.55      538.95      -0.18842      115      0.85088      -1169.1      966
{'Granger_20:Treatment_1'}      509.28      326.28      1.5608      115      0.12131      -137.03      1155.6
{'Granger_25:Treatment_1'}      -146.55      453.95      -0.32283      115      0.74741      -1045.7      752.64
{'Granger_30:Treatment_1'}      458.57      402.89      1.1382      115      0.2574      -339.48      1256.6

Random effects covariance parameters:
Group: Session (16 Levels)
Name1      Name2      Type      Estimate
{'(Intercept)'}      {'(Intercept)'}      {'std'}      1653.6

Group: Error
Name      Estimate
{'sqrt(Dispersion)'}      6287.6

LRstat =

Theoretical Likelihood Ratio Test
Model      DF      AIC      BIC      LogLik      LRstat      deltaDF      pValue
mdlIR      3      2519.6      2528      -1256.8
mdl        10      2527.5      2555.6      -1253.7      6.0892      7      0.52838

```

**EC.3.2. Regression of Earnings onto Logarithm of Granger Causality Test Statistics, All Sessions**

Test 1 results are listed under the heading “Theoretical Likelihood Ratio Test.” Individual slope coefficients (dots in [Figure 7](#)) are listed under “Fixed Effects.”

## 1. HR Granger-Causes Ind Mispricing

```

mdl =
Generalized linear mixed-effects model fit by PL

Model information:
Number of observations      123
Fixed effects coefficients   5
Random effects coefficients 16
Covariance parameters      2
Distribution                 Normal
Link                         Identity
FitMethod                    MPL

Formula:
Earnings ~ 1 + Granger_0 + Granger_5 + Granger_10 + Granger_15 + (1 | Session)

Model fit statistics:
AIC      BIC      Loglikelihood      Deviance
2520.2   2539.9   -1253.1      2506.2

Fixed effects coefficients (95% CIs):
Name      Estimate      SE      tStat      DF      pValue      Lower      Upper
{'(Intercept)'}  24381      845.56      28.834      118      2.9158e-55      22707      26055
{'Granger_0'}    477.15      269.27      1.7721      118      0.078966      -56.065      1010.4
{'Granger_5'}   -10.289      271.12     -0.037949      118      0.96979      -547.18      526.6
{'Granger_10'}  315.02      292.57      1.0767      118      0.2838      -264.36      894.4
{'Granger_15'} -584.46      285.24     -2.049      118      0.042675     -1149.3     -19.616

Random effects covariance parameters:
Group: Session (16 Levels)
Name1      Name2      Type      Estimate
{'(Intercept)'}  {'(Intercept)'}  {'std'}      1243

Group: Error
Name      Estimate
{'sqrt(Dispersion)'}  6322.2

LRstat =
Theoretical Likelihood Ratio Test
Model  DF  AIC  BIC  LogLik  LRstat  devtADF  pValue
mdlLR  3  2519.6  2528  -1256.8
mdl     7  2520.2  2539.9  -1253.1  7.3954  4  0.11641

```

## 2. Ind Mispricing Granger-Causes HR

```
mdl =
Generalized linear mixed-effects model fit by PL

Model information:
Number of observations      123
Fixed effects coefficients    8
Random effects coefficients  16
Covariance parameters       2
Distribution                 Normal
Link                         Identity
FitMethod                    MPL

Formula:
Earnings ~ 1 + Granger_0 + Granger_5 + Granger_10 + Granger_15 + Granger_20 + Granger_25 + Granger_30 + (1 | Session)

Model fit statistics:
AIC      BIC      LogLikelihood      Deviance
2524.5   2552.6   -1252.2      2504.5

Fixed effects coefficients (95% CIs):
Name      Estimate      SE      tStat      DF      pValue      Lower      Upper
{'(Intercept)'}      23961      664.31      36.07      115      1.5575e-64      22646      25277
{'Granger_0'}      -113.69      276.04      -0.41187      115      0.6812      -660.48      433.09
{'Granger_5'}      111.68      249.42      0.44776      115      0.6517      -382.37      605.72
{'Granger_10'}      -85.489      296.92      -0.28792      115      0.77393      -673.64      502.66
{'Granger_15'}      616.85      335.6      1.838      115      0.068636      -47.91      1281.6
{'Granger_20'}      -376.28      328.8      -1.1444      115      0.25484      -1027.6      275.02
{'Granger_25'}      -379.39      314.68      -1.2056      115      0.23043      -1002.7      243.93
{'Granger_30'}      -511.44      290.96      -1.7577      115      0.081451      -1087.8      64.902

Random effects covariance parameters:
Group: Session (16 Levels)
Name1      Name2      Type      Estimate
{'(Intercept)'}      {'(Intercept)'}      {'std'}      677.78

Group: Error
Name      Estimate
{'sqrt(Dispersion)'}      6351.2

LRstat =

Theoretical Likelihood Ratio Test
Model      DF      AIC      BIC      LogLik      LRStat      deltaDF      pValue
mdlIR      3      2519.6      2528      -1256.8
mdl        10      2524.5      2552.6      -1252.2      9.0867      7      0.24649
```

### 3. HR Granger-Causes Holdings

```
mdl =
Generalized linear mixed-effects model fit by PL

Model information:
Number of observations      123
Fixed effects coefficients    5
Random effects coefficients  16
Covariance parameters       2
Distribution                 Normal
Link                         Identity
FitMethod                    MPL

Formula:
Earnings ~ 1 + Granger_0 + Granger_5 + Granger_10 + Granger_15 + (1 | Session)

Model fit statistics:
AIC      BIC      Loglikelihood      Deviance
2523.7   2543.4   -1254.9                2509.7

Fixed effects coefficients (95% CIs):
Name      Estimate      SE      tStat      DF      pValue      Lower      Upper
{'(Intercept)'}  24330      764.47   31.826     118    9.5022e-60   -22816   25844
{'Granger_0'}    58.631     276.5    0.21205    118    0.83244     -488.92   606.18
{'Granger_5'}    462.49     286.21   1.6159     118    0.10878     -104.28   1029.3
{'Granger_10'}  -364.96     282.2   -1.2933    118    0.19845     -923.81   193.88
{'Granger_15'}  145.07     237.85   0.60994    118    0.54308     -325.93   616.07

Random effects covariance parameters:
Group: Session (16 Levels)
Name1      Name2      Type      Estimate
{'(Intercept)'}  {'(Intercept)'}  {'std'}    1290.6

Group: Error
Name      Estimate
{'sqrt(Dispersion)'}  6410.2

LRstat =

Theoretical Likelihood Ratio Test
Model  DF  AIC  BIC  LogLik  LRstat  deltaDF  pValue
mdlIR  3    2519.6  2528  -1256.8
mdl    7    2523.7  2543.4  -1254.9  3.8158  4         0.43151
```

#### 4. Holdings Granger-Cause HR

```

mdl =
Generalized linear mixed-effects model fit by PL

Model information:
Number of observations      123
Fixed effects coefficients    8
Random effects coefficients  16
Covariance parameters       2
Distribution                 Normal
Link                         Identity
FitMethod                    MPL

Formula:
Earnings ~ 1 + Granger_0 + Granger_5 + Granger_10 + Granger_15 + Granger_20 + Granger_25 + Granger_30 + (1 | Session)

Model fit statistics:
AIC      BIC      Loglikelihood      Deviance
2519.2   2547.3   -1249.6      2499.2

Fixed effects coefficients (95% CIs):
Name      Estimate      SE      tStat      DF      pValue      Lower      Upper
{'(Intercept)'}  24329      741.31      32.818     115      3.1303e-60      22860      25797
{'Granger_0'}   -215.99     278.78     -0.77476   115      0.44007      -768.2     336.22
{'Granger_5'}    633.49     310        2.0435     115      0.043284     19.445     1247.5
{'Granger_10'}  -932.09    366.59     -2.5426    115      0.012332     -1658.2    1057.5
{'Granger_15'}  417.21    323.25     1.2907     115      0.19941     -223.08    1057.5
{'Granger_20'}  -507.62    342.4      -1.4825    115      0.14093     -1185.8    170.6
{'Granger_25'}  173.79    278.83     0.62329    115      0.53433     -378.51    726.09
{'Granger_30'}  -104.22   329.31     -0.31647   115      0.75222     -756.51    548.07

Random effects covariance parameters:
Group: Session (16 Levels)
Name1      Name2      Type      Estimate
{'(Intercept)'}  {'(Intercept)'}  {'std'}  1681.5

Group: Error
Name      Estimate
{'sqrt(Dispersion)'}  6064.2

LRstat =

Theoretical Likelihood Ratio Test
Model  DF  AIC  BIC  LogLik  LRStat  deltaDF  pValue
mdlR   3  2519.6  2528  -1256.8
mdl    10  2519.2  2547.3  -1249.6  14.382  7  0.044783

```

## 5. HR Granger-Causes B/A Spread

```

mdl =
Generalized linear mixed-effects model fit by PL

Model information:
Number of observations      123
Fixed effects coefficients    5
Random effects coefficients 16
Covariance parameters       2
Distribution                 Normal
Link                         Identity
FitMethod                    MPL

Formula:
Earnings ~ 1 + Granger_0 + Granger_5 + Granger_10 + Granger_15 + (1 | Ssession)

Model fit statistics:
AIC      BIC      LogLikelihood      Deviance
2524.5   2544.2   -1255.3                2510.5

Fixed effects coefficients (95% CIs):
Name      Estimate      SE      tStat      DF      pValue      Lower      Upper
{'(Intercept)'}  24726      776.79      31.831     118      9.3406e-60      23188      26264
{'Granger_0'}    299.15      275.2       1.087      118      0.27925        -245.83      844.12
{'Granger_5'}    39.605      310.28      0.12764    118      0.89865        -574.84      654.05
{'Granger_10'}   394.78      332.44      1.1875     118      0.23741        -263.54      1053.1
{'Granger_15'}  -88.63      304.89     -0.29069   118      0.7718         -692.4       515.14

Random effects covariance parameters:
Group: Session (16 Levels)
Name1      Name2      Type      Estimate
{'(Intercept)'}  {'(Intercept)'}  {'std'}    1438.4

Group: Error
Name      Estimate
{'sqrt(Dispersion)'}  6406.6

LRstat =
Theoretical Likelihood Ratio Test
Model  DF  AIC  BIC  LogLik  LRstat  deltaDF  pValue
mdlR   3  2519.6  2528  -1256.8
mdl    7  2524.5  2544.2  -1255.3  3.0578  4  0.54819

```

## 6. B/A Spread Granger-Causes HR

```

mdl =
Generalized linear mixed-effects model fit by PL

Model information:
Number of observations      123
Fixed effects coefficients    8
Random effects coefficients  16
Covariance parameters       2
Distribution                 Normal
Link                         Identity
FitMethod                    MPL

Formula:
Earnings ~ 1 + Granger_0 + Granger_5 + Granger_10 + Granger_15 + Granger_20 + Granger_25 + Granger_30 + (1 | Session)

Model fit statistics:
AIC      BIC      LogLikelihood      Deviance
2529     2557.1   -1254.5      2509

Fixed effects coefficients (95% CIs):
Name      Estimate      SE      tStat      DF      pValue      Lower      Upper
{'(Intercept)'}      24523      755.62      32.454      115      9.9793e-60      23026      26020
{'Granger_0'}      -35.877      298.64      -0.12013      115      0.90459      -627.43      555.67
{'Granger_5'}      -208.5      316.43      -0.65889      115      0.51128      -835.29      418.3
{'Granger_10'}      -232.59      360.72      -0.6448      115      0.52034      -947.12      481.93
{'Granger_15'}      85.933      406.24      0.21153      115      0.83285      -718.75      890.62
{'Granger_20'}      309.37      268.21      1.1535      115      0.25112      -221.91      840.64
{'Granger_25'}      -47.52      312.26      -0.15218      115      0.87931      -666.06      571.02
{'Granger_30'}      343.42      297.86      1.153      115      0.25132      -246.58      933.42

Random effects covariance parameters:
Group: Session (16 Levels)
Name1      Name2      Type      Estimate
{'(Intercept)'}      {'(Intercept)'}      {'std'}      1470.6

Group: Error
Name      Estimate
{'sqrt(Dispersion)'}      6359.4

LRstat =

Theoretical Likelihood Ratio Test
Model      DF      AIC      BIC      LogLik      LRstat      deltaDF      pValue
mdlLR      3      2519.6      2528      -1256.8
mdl        10      2529      2557.1   -1254.5      4.6072      7      0.70777

```
